# Supplementary material for: Idecabtagene vicleucel for relapsed and refractory multiple myeloma: post hoc 18-month follow-up of a phase 1 trial
Source: PubMed Central journal article supplement (PMC10504071; doi:10.1038/s41591-023-02496-0), 2023-08-17

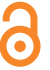

---

# **Idecabtagene vicleucel for relapsed and refractory multiple myeloma: post hoc 18-month follow-up of a phase 1 trial**

---

In the format provided by the authors and unedited

---

## Supplemental Material

**Supplemental Table 1.** Baseline characteristics and prior treatments in dose-escalation and dose-expansion cohorts

| Characteristics                             | Dose escalation<br>(n = 21) | Dose expansion<br>(n = 41) |
|---------------------------------------------|-----------------------------|----------------------------|
| Age, median (range), years                  | 57 (37-74)                  | 63 (44-75)                 |
| Male, n (%)                                 | 13 (61.9)                   | 26 (63.4)                  |
| Time since diagnosis, median (range), years | 4.2 (1.4-15.9)              | 5.9 (0.8-35.7)             |
| ECOG PS 0/1, % <sup>a</sup>                 |                             |                            |
| 0                                           | 8 (38.1)                    | 8 (19.5)                   |
| 1                                           | 11 (52.4)                   | 33 (80.5)                  |
| High-risk cytogenetics, n (%) <sup>b</sup>  | 7 (33.3)                    | 10 (24.4)                  |
| R-ISS III at baseline, n (%)                | 3 (14.3)                    | 8 (19.5)                   |
| High tumor burden, n (%) <sup>c</sup>       | 10 (47.6)                   | 17 (41.5)                  |
| Extramedullary disease, n (%)               | 4 (19.0)                    | 19 (46.3)                  |
| Refractory to last prior therapy, n (%)     | 8 (38.1)                    | 39 (95.1)                  |
| No. of prior regimens, median (range)       | 6 (3-15)                    | 6 (3-18)                   |
| Prior ASCT, n (%)                           | 21 (100)                    | 36 (87.8)                  |
| Prior therapies, exposed / refractory, %    |                             |                            |
| Bortezomib                                  | 100 / 52.4                  | 95.1 / 61.0                |
| Carfilzomib                                 | 90.5 / 52.4                 | 92.7 / 68.3                |
| Ixazomib                                    | 23.8 / 23.8                 | 31.7 / 24.4                |
| Lenalidomide                                | 100 / 71.4                  | 100 / 73.2                 |
| Pomalidomide                                | 90.5 / 61.9                 | 95.1 / 87.8                |
| Daratumumab                                 | 71.4 / 38.1                 | 100 / 97.6                 |
| Isatuximab                                  | 14.3 / 14.3                 | 4.9 / 4.9                  |
| Immunomodulatory and PI                     | 100 / 71.4                  | 100 / 85.4                 |
| Immunomodulatory, PI, and anti-CD38         | 81.0 / 42.9                 | 100 / 82.9                 |
| Bridging therapy, n (%)                     | 8 (38.1)                    | 24 (58.5)                  |

<sup>a</sup>Two patients in the dose-escalation group had ECOG PS 2. <sup>b</sup>del17p, t(4;14), and/or t(14;16). <sup>c</sup>≥ 50% CD138-positive cells or percentage of plasma cells in bone marrow biopsy. ASCT, autologous stem cell transplant; CAR, chimeric antigen receptor; ECOG PS, Eastern Cooperative Oncology Group performance status; PI, proteasome inhibitor; R-ISS, Revised International Staging System.

**Supplemental Table 2.** Tumor response in dose-escalation and dose-expansion cohorts

|                              | 150 × 10 <sup>6</sup> cells |                            | 450 × 10 <sup>6</sup> cells |                            |
|------------------------------|-----------------------------|----------------------------|-----------------------------|----------------------------|
|                              | Dose escalation<br>(n = 6)  | Dose expansion<br>(n = 12) | Dose escalation<br>(n = 9)  | Dose expansion<br>(n = 29) |
| Stringent complete response  | 4 (66.7)                    | 2 (16.7)                   | 4 (44.4)                    | 8 (27.6)                   |
| Complete response            | 0                           | 1 (8.3)                    | 0                           | 2 (6.9)                    |
| Very good partial response   | 0                           | 0                          | 4 (44.4)                    | 12 (41.4)                  |
| Partial response             | 0                           | 2 (16.7)                   | 1 (11.1)                    | 3 (10.3)                   |
| Overall response rate        | 4 (66.7)                    | 5 (41.7)                   | 9 (100)                     | 25 (86.2)                  |
| ≥ Very good partial response | 4 (66.7)                    | 3 (25.0)                   | 8 (88.9)                    | 22 (75.9)                  |

Data presented as n (%).

**Supplemental Figure 1.** CONSORT diagram. <sup>a</sup>One patient who received  $205 \times 10^6$  CAR+ T cells and 1 who received  $305 \times 10^6$  are included under the  $450 \times 10^6$  target dose. ide-cel, idecabtagene vicleucel; PD, progressive disease.

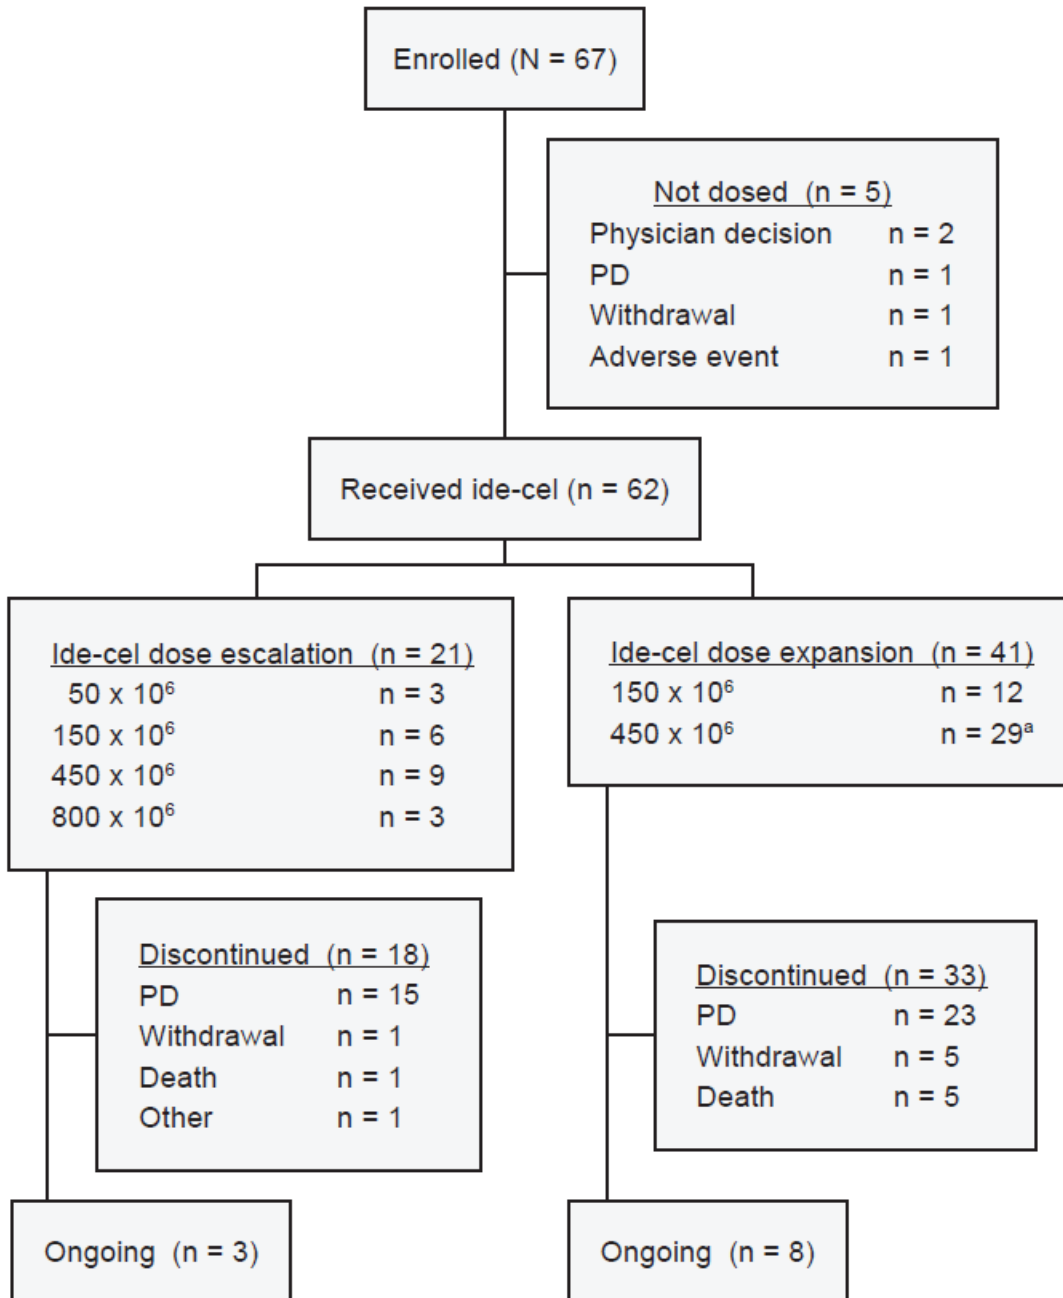

**Supplemental Figure 2.** Efficacy outcomes by target dose, including: a) best overall response, b) duration of response, c) progression-free survival, and e) overall survival.

CR, complete response; DOR, duration of response; ORR, overall response rate; PR, partial response; sCR, stringent complete response; VGPR, very good partial response.

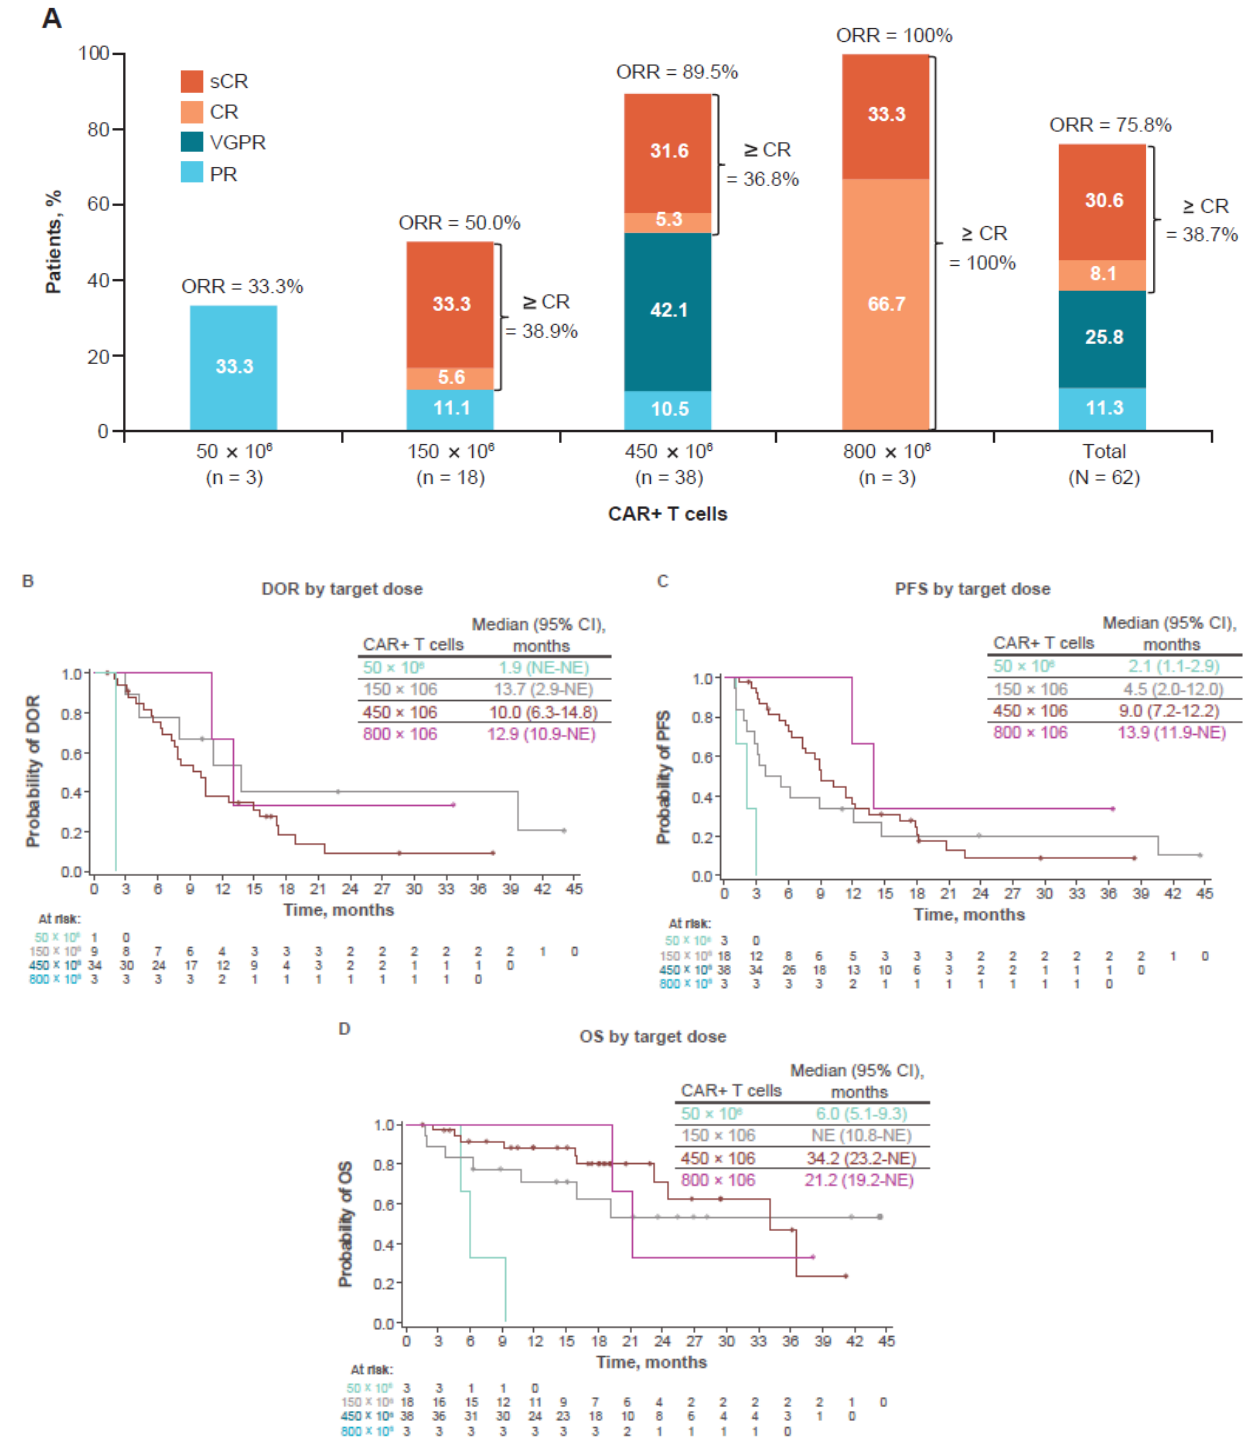

**Supplemental Figure 3.** DOR in patients treated with  $150-450 \times 10^6$  CAR+ T cells by (Aa) age, (B) R-ISS, (C) extramedullary plasmacytoma, and (D) bridging therapy. DOR, duration of response; R-ISS, Revised International Staging System.

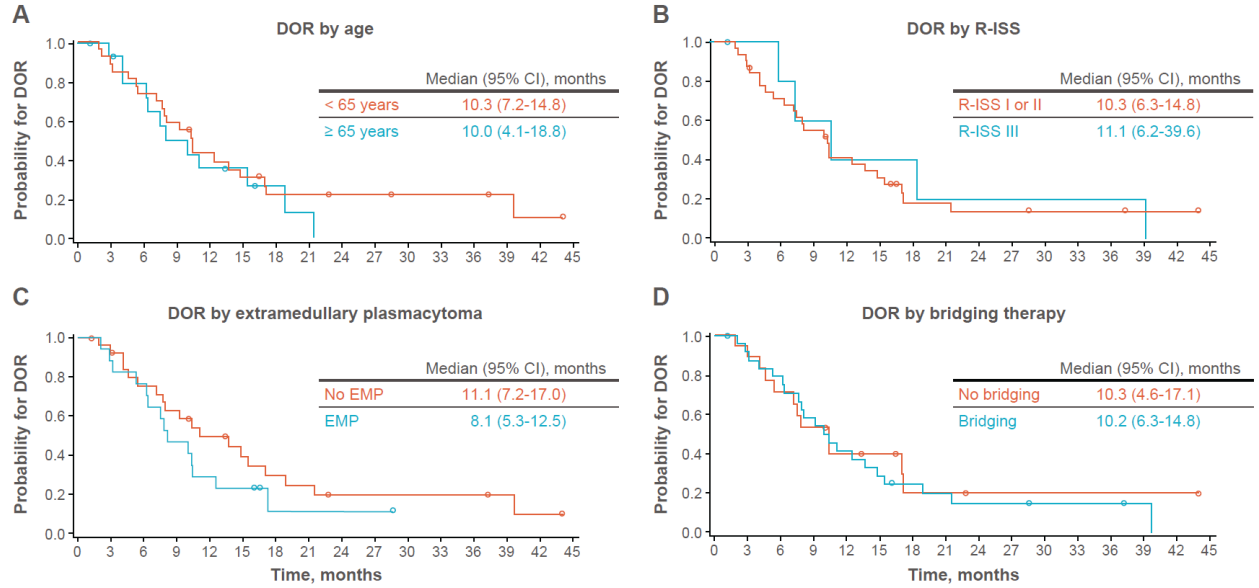

**Supplemental Figure 4.** Swimmer plots for patients with  $\geq$  CR and MRD assessments. One patient who received  $205 \times 10^6$  CAR+ T cells and 1 who received  $305 \times 10^6$  are included under the  $450 \times 10^6$  target dose. MRD assessments after PD not shown. Note that the end of each bar represents the earliest of the study discontinuation rate, cutoff date, or first PD date. The small black arrow indicates ongoing treatment response. AMT data not collected for all patients. AMT, anti-myeloma treatment; CR, complete response; Indet, indeterminate; MRD, minimal residual disease; PD, progressive disease; PR, partial response; sCR, stringent complete response; VGPR, very good partial response.

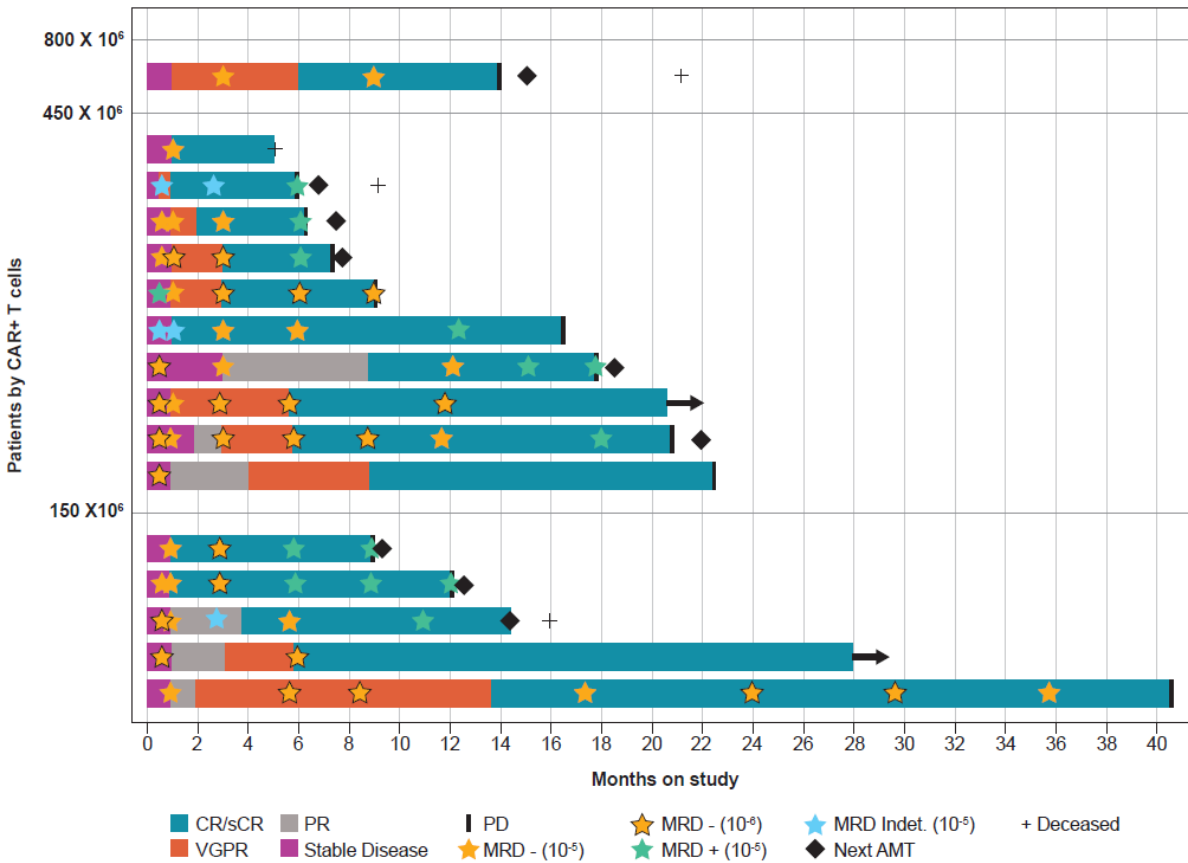

Supplement: 41591_2023_2496_MOESM1_ESM.pdf [file 41591_2023_2496_MOESM1_ESM.pdf]
